# Supplementary material
Source: publisher figshare collection journal article supplement (https://tandf.figshare.com/ndownloader/files/16750547)
Supplement: Supplementary file 1 [file 16750547]

**Supplementary material**

**A RAPID HPLC-PDA SURVEY OF COMMONLY PRESCRIBED ANTIDEPRESSANTS AND CAFFEINE IN SLUDGE FROM SEWAGE TREATMENT PLANTS AND RIVER SEDIMENTS**

Ismael L. COSTA JUNIORa[[1]](#footnote-1); Christiane S. MACHADOa; Adelmo L. PLETSCHb; Yohandra R. TORRESa;

a Department of Chemistry, State University of the Central West, Guarapuava, PR, Brazil.

b Department of Chemistry, Federal Technological University of Paraná, Campus Medianeira, Medianeira, PR, Brazil.

**Table S1. Characterization of sample points**

| **Sample** | **Photo** | **Coordinates** | **Height (m)** | **Depth (m)** | **Description** |
| --- | --- | --- | --- | --- | --- |
| S1 | 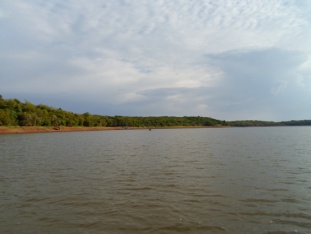 | S 24°30’55.2’’  W 54°13’1.3” | 241 | 3 | Mouth of Arroio Fundo River in Entre Rios do Oeste, PR |
| S2 | 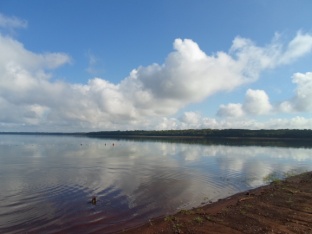 | S 25°13’51.3’’  W 54°13’25.7” | 226 | 1 | Mouth of Ocoi River in São Miguel do Iguaçu, PR |
| S3 | 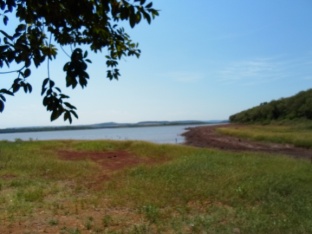 | S 24°50’52.0’’  W 54°19’25.0” | 212 | 1 | Launch region of a STP at the Itaipu Reservoir in Santa Helena, PR |
| S4 | 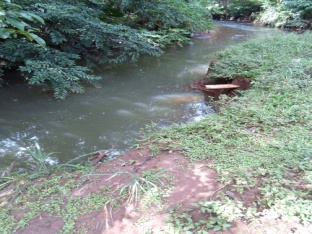 | S 25°17’10.0’’  W 54°06’7.4” | 306 | 0,5 | After the STP sewerage site in Medianeira, PR in the Alegria River |
| L1 | 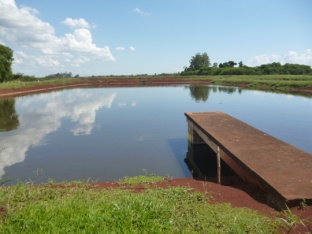 | S 24°51’20.3’’  W 54°19’23.8” | 243 | 1 | Inlet anaerobic pond, STP, Santa Helena, PR. |
| L2 | 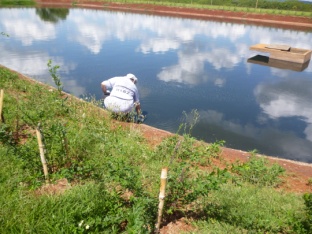 | S 24°51’17.0’’  W 54°19’22.8” | 250 | 1 | Outlet facultative pond, STP, Santa Helena, PR. |
| L3 | 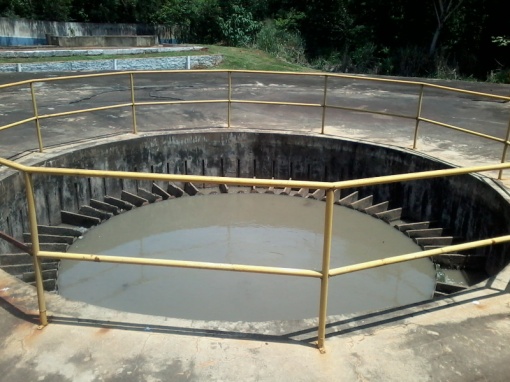 | S 25°17’11.2’’  W 54°6’5.0” | 306 | 0,5 | Inside the reactor AFBR, STP, Medianeira, PR. |
| L4 | 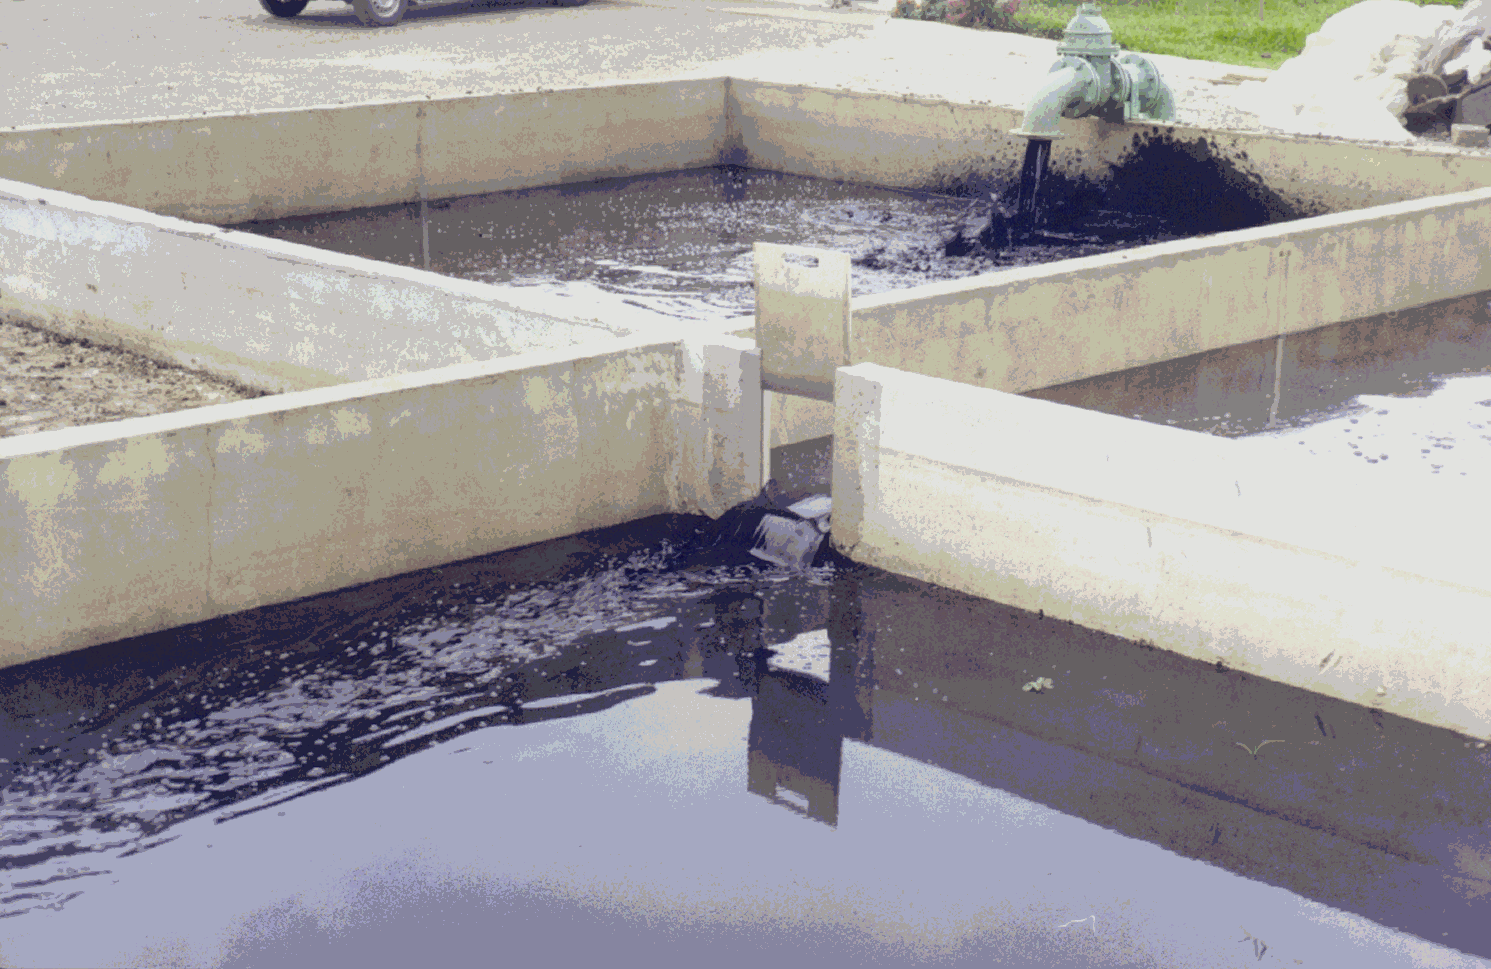 | S 25°17’11.2’’  W 54°6’5.0” | 306 | 0,2 | Drying bed, AFBR, STP, Medianeira, PR. |


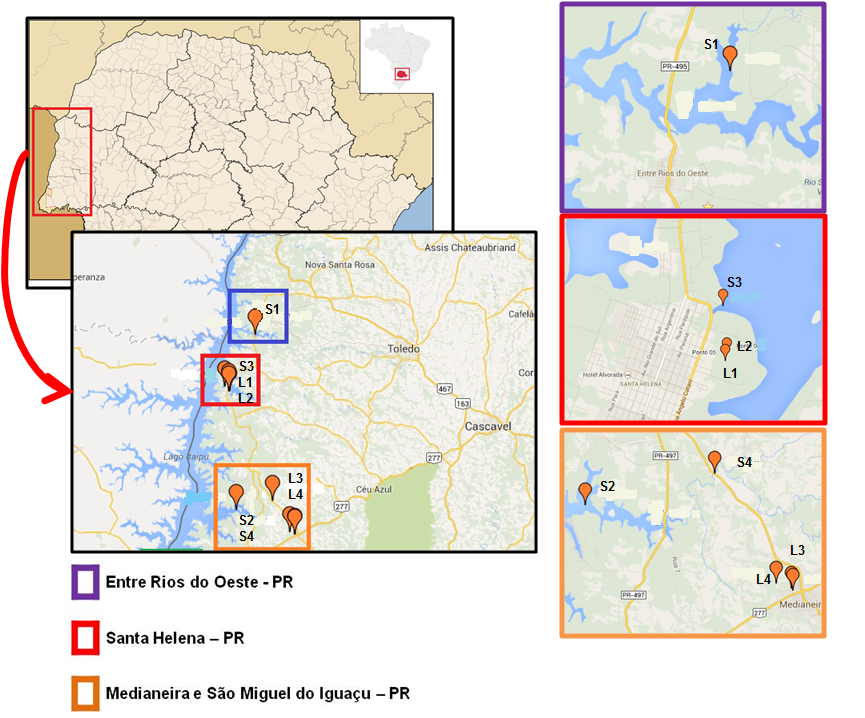


Figure S.18 – Geographical location of collection points

1. 1 Corresponding author: Avenue Brasil, 4232 CEP 85884-000 Medianeira - PR – Brazil.

   +55 (45) 3240-8000 - Fax : +55 (45) 3240-8101
   E-mail Address: ismael@utfpr.edu.br [↑](#footnote-ref-1)
